# Supplementary material for: Spatial differentiation of gully clusters based on the regional scale: an example from northeastern China
Source: PeerJ. 2020 Oct 19;8:e9907. doi: 10.7717/peerj.9907 (PMC7580587; doi:10.7717/peerj.9907)
Supplement: Supplemental Information 1 [file peerj-08-9907-s001.xlsx]

## Sheet: Sheet1
ID	Center longitude	Center latitude	KD			Elevation (m)			Height difference (m)
			Min	Max	Average	Min	Max	Mean
S11	118.571	48.018	0	3.524	0.149	618	807	716	189
S12	119.911	46.0777	0	4.067	1.093	721	1262	932	541
S13	121.203	44.685	0	2.583	0.355	197	560	269	363
S14	122.152	43.6574	0	2.649	0.001	167	224	182	57
S15	123.234	42.6072	0	8.592	0.697	62	431	106	369
S16	124.156	41.6819	0	5.53	2.381	93	856	318	763
S17	125.051	40.8552	0.037	5.068	2.35	146	1105	410	959
S21	119.293	49.2886	0	2.451	0.076	579	706	619	127
S22	120.706	47.6894	0	2.312	0.988	888	1674	1223	786
S23	122.147	46.261	0	4.072	1.002	275	508	354	233
S24	123.333	44.9899	0	7.011	0.062	111	162	141	51
S25	124.606	43.8595	0	6.613	0.003	140	290	189	150
S26	125.682	42.9229	0	6.967	1.289	311	655	377	344
S27	126.641	41.929	0	2.493	0.615	375	1484	777	1109
S31	120.032	50.457	0	1.826	0.411	554	1032	703	478
S32	121.594	49.2436	0	1.856	0.866	769	1272	946	503
S33	123.194	48.0308	0.015	5.429	1.226	200	474	292	274
S34	124.752	46.8093	0	0.05	0.005	130	162	145	32
S35	126.245	45.6963	0	1.95	0.31	102	185	129	83
S36	127.528	44.6429	0	2.29	0.44	194	609	265	415
S37	128.644	43.5319	0	5.296	0.476	349	1224	666	875
S41	120.876	51.8788	0.003	1.322	0.55	415	1150	691	735
S42	122.459	51.0041	0	2.255	0.634	729	1254	945	525
S43	124.182	49.8651	0	2.007	0.709	295	632	397	337
S44	125.843	48.5452	0	4.065	0.731	221	483	277	262
S45	127.557	47.2033	0	5.16	0.966	176	284	216	108
S46	128.934	46.0901	0	5.832	0.706	92	843	192	751
S47	130.27	45.0558	0.094	5.211	1.489	269	727	425	458
S52	123.348	52.9842	0.004	1.476	0.548	336	904	592	568
S53	125.103	51.7727	0	1.506	0.605	365	1031	620	666
S54	126.948	50.1752	0	1.206	0.334	203	607	390	404
S55	128.733	48.8251	0	0.5	0.068	285	523	403	238
S56	130.446	47.5199	0	3.653	0.508	80	400	150	320
S57	131.91	46.5404	0	2.783	0.304	59	550	115	491
